# Supplementary material
Source: publisher site journal article supplement (https://www.kjim.org/upload/media/kjim-2022-283_suppl3.pdf)
Supplement: Supplementary file 1 [file kjim-2022-283_suppl3.pdf]

**Supplementary Table 3. Number needed to screen to detect prediabetes and diabetes according to age group**

| Age group, yr | KNHANES       |                                |      |     | NHIS-NSC      |                                |      |     |
|---------------|---------------|--------------------------------|------|-----|---------------|--------------------------------|------|-----|
|               | No. of people | Screening-positive individuals |      | NNS | No. of people | Screening-positive individuals |      | NNS |
|               |               | No.                            | %    |     |               | No.                            | %    |     |
| 20–24         | 3,241,699     | 382,575                        | 11.8 | 8   | 18,635        | 1,876                          | 10.1 | 10  |
| 25–29         | 3,178,659     | 500,678                        | 15.8 | 6   | 43,252        | 5,479                          | 12.7 | 8   |
| 30–34         | 3,059,687     | 755,591                        | 24.7 | 4   | 39,224        | 7,160                          | 18.3 | 5   |
| 35–39         | 3,615,732     | 1,201,643                      | 33.2 | 3   | 35,900        | 8,354                          | 23.3 | 4   |
| 40–44         | 3,554,636     | 1,408,017                      | 39.6 | 3   | 66,376        | 16,852                         | 25.4 | 4   |
| 45–49         | 3,972,430     | 1,886,942                      | 47.5 | 2   | 46,659        | 14,094                         | 30.2 | 3   |
| 50–54         | 3,568,192     | 2,041,588                      | 57.2 | 2   | 55,904        | 18,396                         | 32.9 | 3   |
| 55–59         | 3,462,634     | 2,079,770                      | 60.1 | 2   | 34,348        | 12,235                         | 35.6 | 3   |
| 60–64         | 2,624,983     | 1,729,276                      | 65.9 | 2   | 30,938        | 11,203                         | 36.2 | 3   |
| 65–69         | 1,754,349     | 1,215,520                      | 69.3 | 1   | 18,330        | 6,782                          | 37.0 | 3   |
| 70–74         | 1,235,052     | 872,477                        | 70.6 | 1   | 16,824        | 6,131                          | 36.4 | 3   |
| ≥ 75          | 1,883,120     | 1,340,935                      | 71.2 | 1   | 11,378        | 4,301                          | 37.8 | 3   |

Values are presented as weighted numbers in the KNHANES.

KNHANES, Korea National Health and Nutrition Examination Survey; NHIS-NSC, National Health Insurance Service-National Sample Cohort; NNS, number needed to screen.
